# Supplementary material for: Fluorination and reduction of CaCrO3 by topochemical methods
Source: Royal Society of Chemistry journal article supplement (doi:10.1039/c9dt04321g), 2020-01-01
Supplement: c9dt04321g1.pdf [file c9dt04321g1.pdf]

## Supporting Information

### Fluorination and reduction of $\text{CaCrO}_3$ by topochemical methods

Christian A. Juillerat,<sup>1, 2\*</sup> Yoshihiro Tsujimoto,<sup>1, 3\*</sup> Akira Chikamatsu,<sup>4</sup> Yuji Masubuchi,<sup>5</sup> Tetsuya Hasegawa,<sup>4</sup> Kazunari Yamaura<sup>1, 3</sup>

<sup>1</sup> *Research Center for Functional Materials, National Institute for Materials Science, 1-1 Namiki, Tsukuba, Ibaraki 305-0044, Japan*

<sup>2</sup> *Department of Chemistry and Biochemistry, University of South Carolina, Columbia, South Carolina 29208, USA*

<sup>3</sup> *Graduate School of Chemical Sciences and Engineering, Hokkaido University, North 13 West 8, Kita-ku, Sapporo 060-0808, Japan*

<sup>4</sup> *Department of Chemistry, The University of Tokyo, 7-3-1 Hongo, Bunkyo-ku, Tokyo 113-0033, Japan*

<sup>5</sup> *Faculty of Engineering, Hokkaido University, North 13 West 8, Kita-ku, Sapporo 060-8628, Japan*

\*Corresponding authors

Email: [juillerc@email.sc.edu](mailto:juillerc@email.sc.edu), [TSUJIMOTO.Yoshihiro@nims.go.jp](mailto:TSUJIMOTO.Yoshihiro@nims.go.jp)

**Table S1.** Crystallographic Parameters Refined from Synchrotron X-ray Powder Diffraction Data Collected from the Fluorinated  $\text{CaCrO}_3$  at Room Temperature.

| atom | site | $x$       | $y$       | $z$       | $g$ | $B_{\text{iso}}/\text{\AA}^2$ |
|------|------|-----------|-----------|-----------|-----|-------------------------------|
| Ca   | 4c   | 0.0068(4) | 0.0411(1) | 1/4       | 1   | 0.347(14)                     |
| Cr   | 4b   | 1/2       | 0         | 0         | 1   | 0.559(11)                     |
| X1   | 8d   | 0.7096(6) | 0.2949(5) | 0.0294(4) | 1   | 0.25(3)                       |
| X2   | 4c   | 0.0825(8) | 0.4857(6) | 1/4       | 1   | 0.25                          |

Space group  $Pbnm$  (No. 62):  $a = 5.34098(9) \text{ \AA}$ ,  $b = 5.40324(9) \text{ \AA}$ ,  $c = 7.53180(10) \text{ \AA}$ .  $R$  indices are  $R_{\text{wp}} = 2.01\%$ ,  $R_{\text{B}} = 3.73\%$ , and  $R_{\text{F}} = 2.40\%$ . No deficiencies were found at all site occupancies ( $g$ ). All of the anion sites ( $X$ ) were assumed to be O.  $B_{\text{iso}}$  values for X1 and X2 sites were constrained to the same.

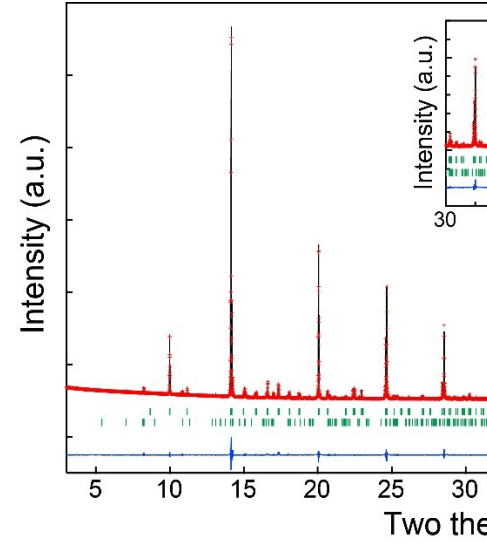

**Figure S2.** Rietveld refinement against the SXRD data collected from  $\text{CaCrO}_3$  at room temperature. The observed (red crosses), calculated (black solid line), and difference (blue solid line) plots are shown. The vertical lines represent  $\text{CaCrO}_3$  (87%) and  $\text{CaCr}_2\text{O}_4$  (13%) from top to bottom. The inset shows an enlarged plot in a high  $2\theta$  region.

**Table S2.** Crystallographic Parameters Refined from Synchrotron X-ray Powder Diffraction Data Collected from  $\text{CaCrO}_3$  at Room Temperature.

| atom | site | $x$       | $y$        | $z$       | $g$ | $B_{\text{iso}}/\text{\AA}^2$ |
|------|------|-----------|------------|-----------|-----|-------------------------------|
| Ca   | 4c   | -0047(2)  | 0.03029(8) | 1/4       | 1   | 0.511(7)                      |
| Cr   | 4b   | 1/2       | 0          | 0         | 1   | 0.235(6)                      |
| O1   | 8d   | 0.7132(2) | 0.2863(2)  | 0.0331(2) | 1   | 0.31(2)                       |
| O2   | 4c   | 0.0611(3) | 0.4896(3)  | 1/4       | 1   | 0.38(3)                       |

Space group  $Pbnm$  (No. 62):  $a = 5.28912(1) \text{ \AA}$ ,  $b = 5.31796(1) \text{ \AA}$ ,  $c = 7.48677(1) \text{ \AA}$ .  $R$  indices are  $R_{\text{wp}} = 4.06\%$ ,  $R_{\text{B}} = 3.21\%$ , and  $R_{\text{F}} = 2.40\%$ . All site occupancies were fixed to unity.

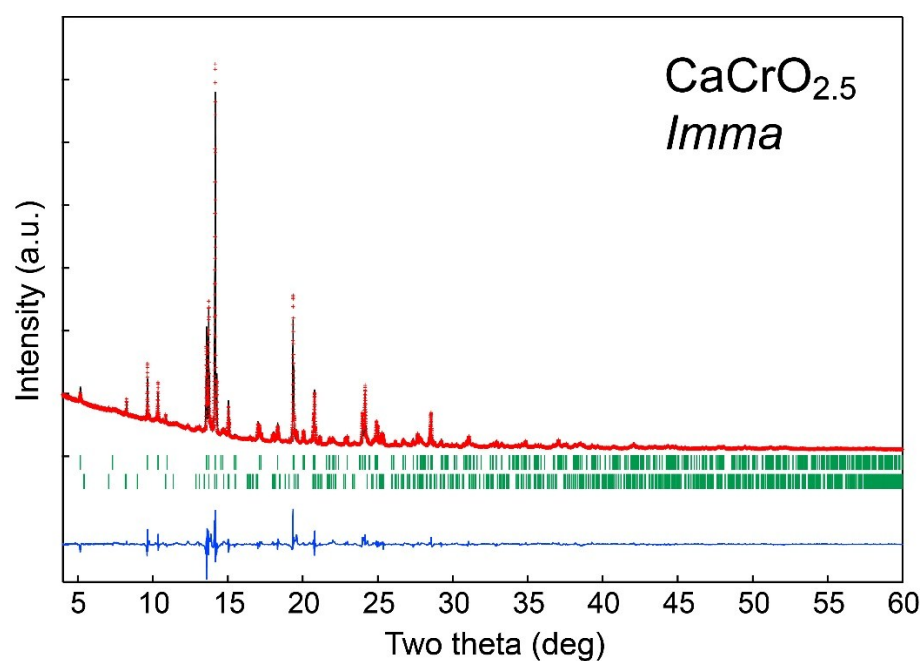

**Figure S3.** Rietveld refinement against the SXRD data collected from  $\text{CaCrO}_{2.5}$  at room temperature. The observed (red crosses), calculated (black solid line), and difference (blue solid line) plots are shown. The vertical lines represent  $\text{CaCrO}_{2.5}$  (86%) and  $\text{CaCr}_2\text{O}_4$  (14%) from top to bottom.

**Table S3.** Crystallographic Parameters Refined from Synchrotron X-ray Powder Diffraction Data Collected from  $\text{CaCrO}_{2.5}$  at Room Temperature.

| atom | site | $x$       | $y$         | $z$       | $g$ | $B_{\text{iso}}/\text{\AA}^2$ |
|------|------|-----------|-------------|-----------|-----|-------------------------------|
| Ca   | 8h   | 0         | 0.61380(15) | 0.4980(7) | 1   | 1.19(5)                       |
| Cr1  | 4a   | 0         | 0           | 0         | 1   | 0.59(5)                       |
| Cr2  | 8i   | 0.4273(4) | 1/4         | 0.5114(8) | 0.5 | 0.17(7)                       |

|    |    |          |           |           |     |         |
|----|----|----------|-----------|-----------|-----|---------|
| O1 | 8g | 1/4      | 0.0065(7) | 1/4       | 1   | 0.94(9) |
| O2 | 8h | 0        | 0.1399(3) | 0.0608(9) | 1   | 0.94    |
| O3 | 8i | 0.197(2) | 1/4       | 0.673(2)  | 0.5 | 0.94    |

Space group *Imma* (No. 74):  $a = 5.52141(6)$  Å,  $b = 14.48419(13)$  Å,  $c = 5.46196(5)$  Å.  $R$  indices are  $R_{\text{wp}} = 6.20\%$ ,  $R_{\text{B}} = 9.83\%$ , and  $R_{\text{F}} = 6.93\%$ . All site occupancies were fixed to unity or half.  $B_{\text{iso}}$  values for O1, O2, and O3 sites were constrained to the same value.

**Table S4.** Bond Valence Sums for different anion ordering models.

| Structure                                                               | Ca   | Cr   | X1   | X2   |
|-------------------------------------------------------------------------|------|------|------|------|
| CaCrO <sub>3</sub>                                                      | 2.28 | 3.98 | 2.08 | 2.11 |
| Expected values                                                         | 2    | 3.5  | 2    | 2    |
| CaCrO <sub>2.5</sub> F <sub>0.5</sub><br>(Full anion disorder)          | 2.15 | 3.34 | 1.8  | 1.88 |
| Expected values                                                         | 2    | 3.5  | 1.83 | 1.83 |
| CaCrO <sub>2.5</sub> F <sub>0.5</sub><br>(Occupation of X1 by fluorine) | 2.14 | 3.34 | 1.75 | 1.98 |
| Expected values                                                         | 2    | 3.5  | 1.75 | 2    |
| CaCrO <sub>2.5</sub> F <sub>0.5</sub><br>(Occupation of X2 by fluorine) | 1.89 | 3.34 | 1.68 | 1.89 |
| Expected values                                                         | 2    | 3.5  | 1.5  | 2    |

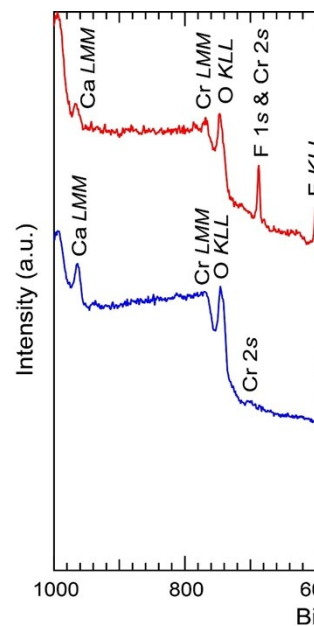

**Figure S3.** Wide scan X-ray

photoelectron spectra collected from  $\text{CaCrO}_3$  and its fluorinated phase at 300 K.

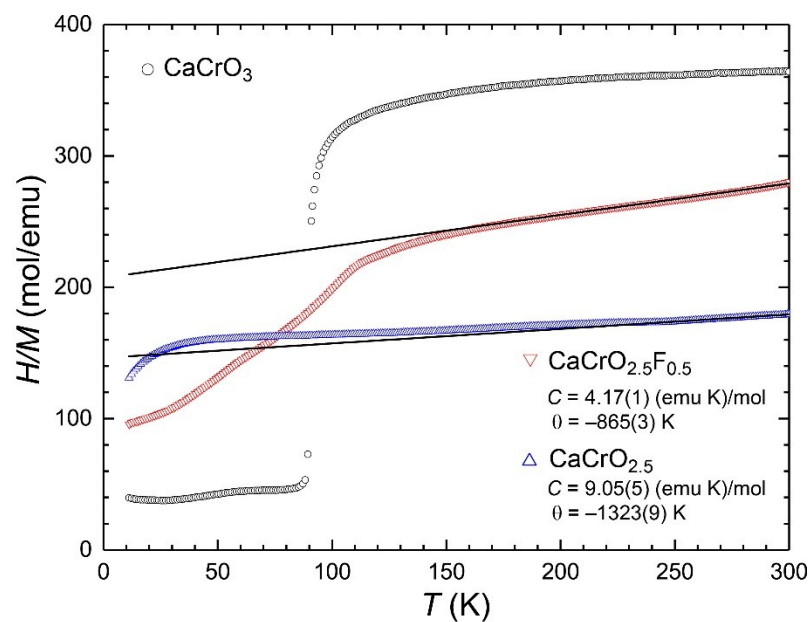

**Figure S4.** Temperature dependence of the inverse susceptibility of  $\text{CaCrO}_3$ ,  $\text{CaCrO}_{2.5}$ , and  $\text{CaCrO}_{2.5}\text{F}_{0.5}$ . The Curie-Weiss fit to the data for  $\text{CaCrO}_{2.5}$  and  $\text{CaCrO}_{2.5}\text{F}_{0.5}$  gave physically meaningless Weiss temperatures and much higher Curie constants than those expected from the oxidation states of chromium ions.
